# Supplementary material for: In Ovo Models to Predict Virulence of Highly Pathogenic Avian Influenza H5-Viruses for Chickens and Ducks
Source: MDPI journal article supplement (doi:10.3390/v16040563), 2024-04-04
Supplement: s1 [file s1]

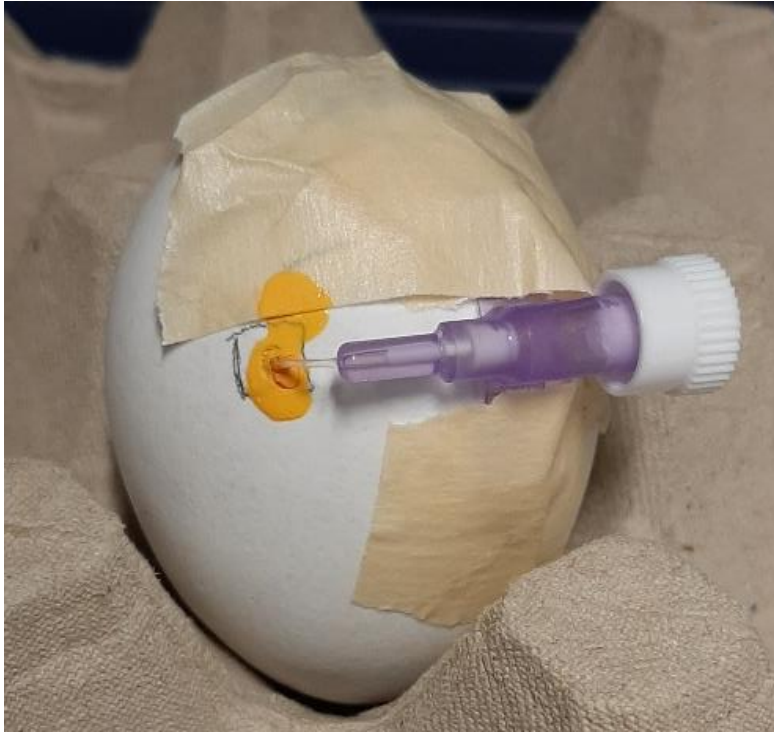

**Figure S1:** 26 Gauge cannula attachment to embryonated chicken egg. Opening is closed with nail polish.

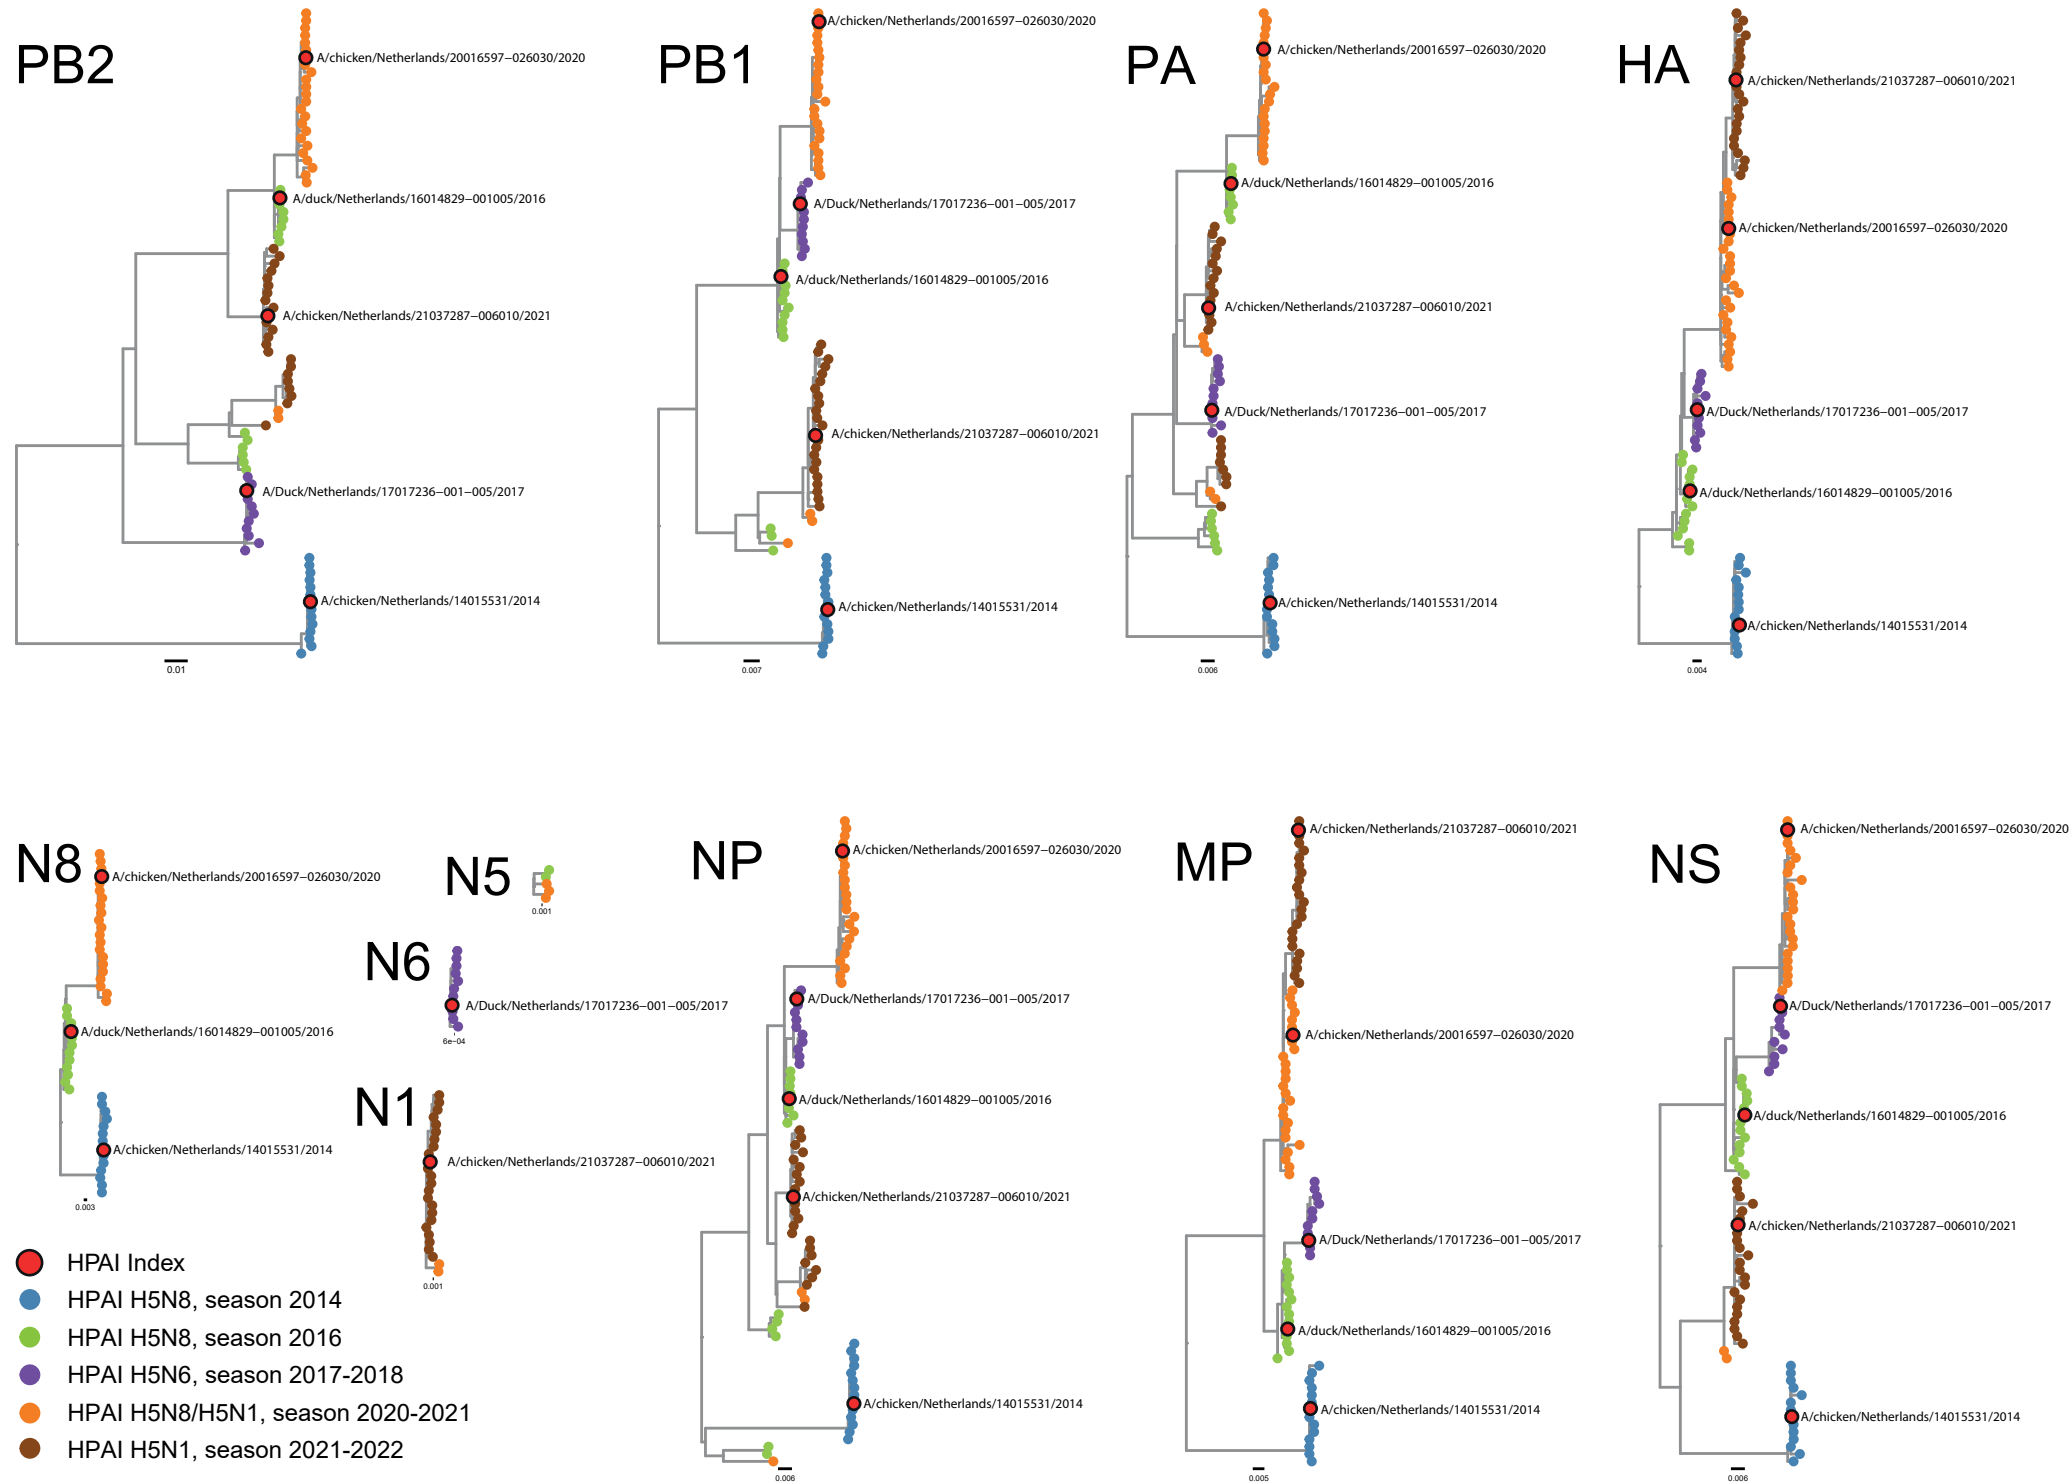

**Figure S2:** Phylogenetic trees with the strains used in this study and a random selection of AI strains from the different European outbreak seasons (2014 to 2022) inferred using maximum likelihood (ML) methods. Trees are provided for each of the 8 segments. Tips shaded by outbreak season. Additional strains were obtained from the GISAID database (see acknowledgement table S9).

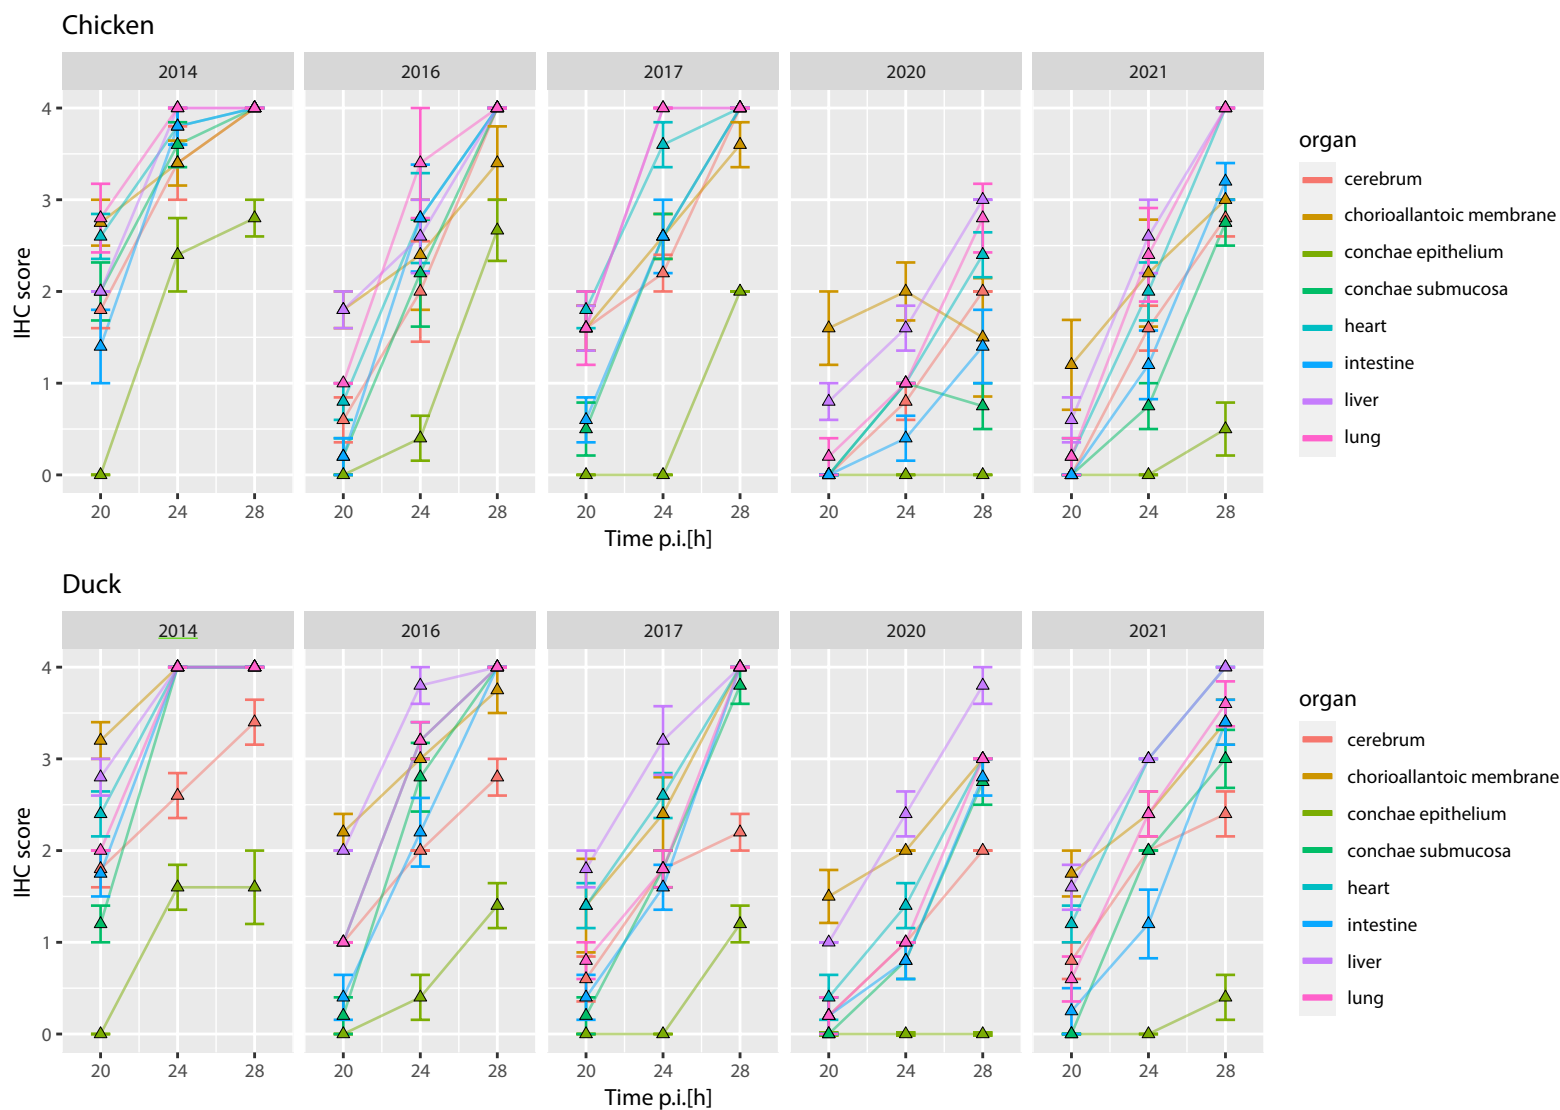

**Figure S3:** Mean virus antigen score (immunohistochemistry) in embryonic chicken and Pekin duck organs inoculated with five HPAI H5 viruses. Organs are collected at 20 hours , 24 hours and 28 hours post infection  $n=5$ .

**Table S1:** Replication in chicken embryo allantoic fluid significance determined by linear regression broken stick model for 0-6 hours post infection and 6-15 hours post infection.

| <b>Model</b>                      | <b>Virus comparison</b> | <b>t-ratio</b> | <b>p-value</b> |
|-----------------------------------|-------------------------|----------------|----------------|
| <b>Chicken 0h-6h replication</b>  | virus2014 - virus2016   | 3.636          | 0.0030         |
| <b>Chicken 0h-6h replication</b>  | virus2014 - virus2017   | 2.740          | 0.0635         |
| <b>Chicken 0h-6h replication</b>  | virus2014 - virus2020   | 3.560          | 0.0040         |
| <b>Chicken 0h-6h replication</b>  | virus2014 - virus2021   | 2.615          | 0.0918         |
| <b>Chicken 0h-6h replication</b>  | virus2016 - virus2017   | -0.865         | 1.0000         |
| <b>Chicken 0h-6h replication</b>  | virus2016 - virus2020   | 0.003          | 1.0000         |
| <b>Chicken 0h-6h replication</b>  | virus2016 - virus2021   | -0.986         | 1.0000         |
| <b>Chicken 0h-6h replication</b>  | virus2017 - virus2020   | 0.851          | 1.0000         |
| <b>Chicken 0h-6h replication</b>  | virus2017 - virus2021   | -0.121         | 1.0000         |
| <b>Chicken 0h-6h replication</b>  | virus2020 - virus2021   | -0.969         | 1.0000         |
| <b>Chicken 6h-15h replication</b> | virus2014 - virus2016   | 5.555          | <.0001         |
| <b>Chicken 6h-15h replication</b> | virus2014 - virus2017   | 6.783          | <.0001         |
| <b>Chicken 6h-15h replication</b> | virus2014 - virus2020   | 7.165          | <.0001         |
| <b>Chicken 6h-15h replication</b> | virus2014 - virus2021   | 1.274          | 1.0000         |
| <b>Chicken 6h-15h replication</b> | virus2016 - virus2017   | 1.186          | 1.0000         |
| <b>Chicken 6h-15h replication</b> | virus2016 - virus2020   | 1.673          | 0.9492         |
| <b>Chicken 6h-15h replication</b> | virus2016 - virus2021   | -4.136         | 0.0004         |
| <b>Chicken 6h-15h replication</b> | virus2017 - virus2020   | 0.511          | 1.0000         |
| <b>Chicken 6h-15h replication</b> | virus2017 - virus2021   | -5.322         | <.0001         |
| <b>Chicken 6h-15h replication</b> | virus2020 - virus2021   | -5.726         | <.0001         |

**Table S2:** Replication in duck embryo allantoic fluid significance determined by linear regression broken stick model for 0-6 hours post infection and 6-15 hours post infection.

| <b>Model</b>                   | <b>Virus comparison</b> | <b>t-ratio</b> | <b>p-value</b> |
|--------------------------------|-------------------------|----------------|----------------|
| <b>Duck 0h-6h replication</b>  | virus2014 - virus2016   | 0.706          | 1.0000         |
| <b>Duck 0h-6h replication</b>  | virus2014 - virus2017   | 0.477          | 1.0000         |
| <b>Duck 0h-6h replication</b>  | virus2014 - virus2020   | 1.059          | 1.0000         |
| <b>Duck 0h-6h replication</b>  | virus2014 - virus2021   | 2.023          | 0.4358         |
| <b>Duck 0h-6h replication</b>  | virus2016 - virus2017   | -0.226         | 1.0000         |
| <b>Duck 0h-6h replication</b>  | virus2016 - virus2020   | 0.360          | 1.0000         |
| <b>Duck 0h-6h replication</b>  | virus2016 - virus2021   | 1.295          | 1.0000         |
| <b>Duck 0h-6h replication</b>  | virus2017 - virus2020   | 0.582          | 1.0000         |
| <b>Duck 0h-6h replication</b>  | virus2017 - virus2021   | 1.520          | 1.0000         |
| <b>Duck 0h-6h replication</b>  | virus2020 - virus2021   | 0.910          | 1.0000         |
| <b>Duck 6h-15h replication</b> | virus2014 - virus2016   | 3.444          | 0.0062         |
| <b>Duck 6h-15h replication</b> | virus2014 - virus2017   | 6.304          | <.0001         |
| <b>Duck 6h-15h replication</b> | virus2014 - virus2020   | 11.221         | <.0001         |
| <b>Duck 6h-15h replication</b> | virus2014 - virus2021   | 2.020          | 0.4390         |
| <b>Duck 6h-15h replication</b> | virus2016 - virus2017   | 2.812          | 0.0510         |
| <b>Duck 6h-15h replication</b> | virus2016 - virus2020   | 7.716          | <.0001         |
| <b>Duck 6h-15h replication</b> | virus2016 - virus2021   | -1.400         | 1.0000         |
| <b>Duck 6h-15h replication</b> | virus2017 - virus2020   | 4.957          | <.0001         |
| <b>Duck 6h-15h replication</b> | virus2017 - virus2021   | -4.213         | 0.0003         |
| <b>Duck 6h-15h replication</b> | virus2020 - virus2021   | -9.090         | <.0001         |

**Table S3:** The Cox model was used to measure the effect of the differences between chicken embryo survival times of the five HPAI H5-viruses using a Tukey-corrected pairwise comparison .

| <b>Virus comparison</b>      | <b>t-ratio</b> | <b>p-value</b> |
|------------------------------|----------------|----------------|
| <b>virus2014 - virus2016</b> | 5.197          | <.0001         |
| <b>virus2014 - virus2017</b> | 2.639          | 0.0634         |
| <b>virus2014 - virus2020</b> | 5.144          | <.0001         |
| <b>virus2014 - virus2021</b> | 2.625          | 0.0659         |
| <b>virus2016 - virus2017</b> | -2.907         | 0.0300         |
| <b>virus2016 - virus2020</b> | 0.034          | 1.0000         |
| <b>virus2016 - virus2021</b> | -2.954         | 0.0261         |
| <b>virus2017 - virus2020</b> | 2.875          | 0.0329         |
| <b>virus2017 - virus2021</b> | 0.005          | 1.0000         |
| <b>virus2020 - virus2021</b> | -2.930         | 0.0280         |

**Table S4:** The Cox model was used to measure the effect of the differences between duck embryo survival times of the five HPAI H5-viruses using a Tukey-corrected pairwise comparison.

| <b>Virus comparison</b>      | <b>t-ratio</b> | <b>p-value</b> |
|------------------------------|----------------|----------------|
| <b>virus2014 - virus2016</b> | 4.732          | <.0001         |
| <b>virus2014 - virus2017</b> | 4.970          | <.0001         |
| <b>virus2014 - virus2020</b> | 10.319         | <.0001         |
| <b>virus2014 - virus2021</b> | 6.494          | <.0001         |
| <b>virus2016 - virus2017</b> | 0.295          | 0.9984         |
| <b>virus2016 - virus2020</b> | 7.725          | <.0001         |
| <b>virus2016 - virus2021</b> | 2.658          | 0.0604         |
| <b>virus2017 - virus2020</b> | 7.657          | <.0001         |
| <b>virus2017 - virus2021</b> | 2.430          | 0.1073         |
| <b>virus2020 - virus2021</b> | -6.218         | <.0001         |

**Table S5:** Organ specific method for immunohistochemistry (IHC) and cell type scoring.

| Organ                                | Scoring method                                                                                                                                 |
|--------------------------------------|------------------------------------------------------------------------------------------------------------------------------------------------|
| Cerebrum IHC score 1                 | < 5 positive cells on average of 5 microscopic fields with objective 10x                                                                       |
| Cerebrum IHC score 2                 | > 5 -30 positive cell on average of 5 microscopic fields, multifocal staining not coalescent                                                   |
| Cerebrum IHC score 3                 | Multifocal to coalescent staining of cells, including neuropil (< 50% of neuropil)                                                             |
| Cerebrum IHC score 4                 | Multifocal to coalescent staining of cells, including neuropil (> 50% of neuropil)                                                             |
| Conchae submucosa IHC score 1        | Multifocal staining of individual blood vessel                                                                                                 |
| Conchae submucosa IHC score 2        | Multifocal to coalescing staining of individual blood vessels, mainly superficial in mucosa                                                    |
| Conchae submucosa IHC score 3        | Diffuse staining of individual blood vessels in superficial and deep mucosa and staining of white blood cells within vessels                   |
| Conchae submucosa IHC score 4        | Diffuse staining of submucosa and large vessels                                                                                                |
| Conchae epithelial cells IHC score 1 | Staining of few epithelial cells (< 5 foci), mostly individual cells with objective 20x                                                        |
| Conchae epithelial cells IHC score 2 | Multifocal staining of individual epithelial cells, but also clusters of 2-5 cells together (< 10 foci)                                        |
| Conchae epithelial cells IHC score 3 | Multifocal staining of individual epithelial cells, but also clusters of 2-5 cells together (> 10 foci)                                        |
| Conchae epithelial cells IHC score 4 | Not evaluated, no tissues with this expression                                                                                                 |
| Lung IHC score 1                     | < 5 positive cells/foci on average of 5 microscopic fields with objective 10x                                                                  |
| Lung IHC score 2                     | > 5 -30 positive cells/foci on average of 5 microscopic field, multifocal staining not coalescent                                              |
| Lung IHC score 3                     | Diffuse staining of endothelial cells                                                                                                          |
| Lung IHC score 4                     | Diffuse staining of endothelial cells, individual staining cells are difficult to recognize                                                    |
| Heart IHC score 1                    | < 10 positive cells/foci on average of 5 microscopic fields with objective 10x                                                                 |
| Heart IHC score 2                    | > 10 -50 positive cells/foci on average of 5 microscopic field, multifocal staining not coalescent                                             |
| Heart IHC score 3                    | Diffuse staining of endothelial cells and also cardiomyocytes                                                                                  |
| Heart IHC score 4                    | Diffuse staining of endothelial cells and also cardiomyocytes, individual staining cells are difficult to recognize                            |
| Liver IHC score 1                    | < 10 positive cells/foci on average of 5 microscopic fields with objective 20x                                                                 |
| Liver IHC score 2                    | > 10 -50 positive cells/foci on average of 5 microscopic field, multifocal staining not coalescent                                             |
| Liver IHC score 3                    | Diffuse staining of cells lining sinusoids and in sinusoids                                                                                    |
| Liver IHC score 4                    | Diffuse staining of cells lining sinusoids and in sinusoids, also staining of hepatocytes individual staining cells are difficult to recognize |



|                                        |                                                                                                                        |
|----------------------------------------|------------------------------------------------------------------------------------------------------------------------|
| Intestine IHC score 1                  | < 10 positive cells/foci on average of 5 microscopic fields with objective 20x                                         |
| Intestine IHC score 2                  | > 10 -50 positive cells/foci on average of 5 microscopic field, multifocal staining not coalescent, also serosal cells |
| Intestine IHC score 3                  | Diffuse staining of serosal cells                                                                                      |
| Intestine IHC score 4                  | Diffuse staining of serosal cells, extending to muscular layer                                                         |
| Chorion allantoic membrane IHC score 1 | < 5 positive cells/foci on average of 5 microscopic fields with objective 10x                                          |
| Chorion allantoic membrane IHC score 2 | > 5 -30 positive cells/foci on average of 5 microscopic field, multifocal staining not coalescent                      |
| Chorion allantoic membrane IHC score 3 | Diffuse staining of endothelial cells                                                                                  |
| Chorion allantoic membrane IHC score 4 | Diffuse staining of endothelial cells, individual staining cells are difficult to recognize                            |

**Table S6:** Chicken embryo virus antigen scores in different organs were grouped according to the best fitting model of the factor analysis followed by a Tukey corrected pairwise comparison.

| <b>Model</b>       | <b>Virus comparison</b> | <b>t-ratio</b> | <b>p-value</b> |
|--------------------|-------------------------|----------------|----------------|
| <b>Chicken 20h</b> | virus2014 - virus2016   | 4.069          | 0.0017         |
| <b>Chicken 20h</b> | virus2014 - virus2017   | 2.456          | 0.1194         |
| <b>Chicken 20h</b> | virus2014 - virus2020   | 5.678          | <.0001         |
| <b>Chicken 20h</b> | virus2014 - virus2021   | 5.019          | 0.0001         |
| <b>Chicken 20h</b> | virus2016 - virus2017   | -1.481         | 0.5802         |
| <b>Chicken 20h</b> | virus2016 - virus2020   | 1.917          | 0.3236         |
| <b>Chicken 20h</b> | virus2016 - virus2021   | 1.932          | 0.3156         |
| <b>Chicken 20h</b> | virus2017 - virus2020   | 3.223          | 0.0190         |
| <b>Chicken 20h</b> | virus2017 - virus2021   | 3.014          | 0.0327         |
| <b>Chicken 20h</b> | virus2020 - virus2021   | 0.382          | 0.9953         |
| <b>Chicken 24h</b> | virus2014 - virus2016   | 3.790          | 0.0039         |
| <b>Chicken 24h</b> | virus2014 - virus2017   | 2.174          | 0.2080         |
| <b>Chicken 24h</b> | virus2014 - virus2020   | 6.862          | <.0001         |
| <b>Chicken 24h</b> | virus2014 - virus2021   | 6.595          | <.0001         |
| <b>Chicken 24h</b> | virus2016 - virus2017   | -1.615         | 0.4958         |
| <b>Chicken 24h</b> | virus2016 - virus2020   | 3.998          | 0.0021         |
| <b>Chicken 24h</b> | virus2016 - virus2021   | 3.022          | 0.0320         |
| <b>Chicken 24h</b> | virus2017 - virus2020   | 5.219          | <.0001         |
| <b>Chicken 24h</b> | virus2017 - virus2021   | 4.545          | 0.0004         |
| <b>Chicken 24h</b> | virus2020 - virus2021   | -1.521         | 0.5547         |
| <b>Chicken 28h</b> | virus2014 - virus2016   | 0.012          | 1.0000         |
| <b>Chicken 28h</b> | virus2014 - virus2017   | 0.150          | 0.9999         |
| <b>Chicken 28h</b> | virus2014 - virus2020   | 6.105          | <.0001         |
| <b>Chicken 28h</b> | virus2014 - virus2021   | 1.821          | 0.3745         |
| <b>Chicken 28h</b> | virus2016 - virus2017   | 0.118          | 1.0000         |
| <b>Chicken 28h</b> | virus2016 - virus2020   | 5.450          | <.0001         |
| <b>Chicken 28h</b> | virus2016 - virus2021   | 1.588          | 0.5127         |
| <b>Chicken 28h</b> | virus2017 - virus2020   | 5.976          | <.0001         |
| <b>Chicken 28h</b> | virus2017 - virus2021   | 1.680          | 0.4563         |
| <b>Chicken 28h</b> | virus2020 - virus2021   | -4.238         | 0.0010         |

**Table S7:** Chicken embryo virus antigen scores in different organs were grouped according to the best fitting model of the factor analysis followed by a Tukey corrected pairwise comparison.

| <b>Model</b> | <b>Virus comparison</b> | <b>t-ratio</b> | <b>p-value</b> |
|--------------|-------------------------|----------------|----------------|
| Duck 20h     | virus2014 - virus2016   | 4.766          | 0.0001         |
| Duck 20h     | virus2014 - virus2017   | 5.583          | <.0001         |
| Duck 20h     | virus2014 - virus2020   | 7.898          | <.0001         |
| Duck 20h     | virus2014 - virus2021   | 6.128          | <.0001         |
| Duck 20h     | virus2016 - virus2017   | 0.817          | 0.9244         |
| Duck 20h     | virus2016 - virus2020   | 3.132          | 0.0217         |
| Duck 20h     | virus2016 - virus2021   | 1.362          | 0.6541         |
| Duck 20h     | virus2017 - virus2020   | 2.315          | 0.1545         |
| Duck 20h     | virus2017 - virus2021   | 0.545          | 0.9822         |
| Duck 20h     | virus2020 - virus2021   | -1.770         | 0.4003         |
| Duck 24h     | virus2014 - virus2016   | 5.174          | <.0001         |
| Duck 24h     | virus2014 - virus2017   | 8.851          | <.0001         |
| Duck 24h     | virus2014 - virus2020   | 12.800         | <.0001         |
| Duck 24h     | virus2014 - virus2021   | 8.306          | <.0001         |
| Duck 24h     | virus2016 - virus2017   | 3.677          | 0.0045         |
| Duck 24h     | virus2016 - virus2020   | 7.625          | <.0001         |
| Duck 24h     | virus2016 - virus2021   | 3.132          | 0.0217         |
| Duck 24h     | virus2017 - virus2020   | 3.949          | 0.0019         |
| Duck 24h     | virus2017 - virus2021   | -0.545         | 0.9822         |
| Duck 24h     | virus2020 - virus2021   | -4.494         | 0.0003         |
| Duck 28h     | virus2014 - virus2016   | 2.043          | 0.2588         |
| Duck 28h     | virus2014 - virus2017   | 1.770          | 0.4003         |
| Duck 28h     | virus2014 - virus2020   | 6.672          | <.0001         |
| Duck 28h     | virus2014 - virus2021   | 3.813          | 0.0029         |
| Duck 28h     | virus2016 - virus2017   | -0.272         | 0.9988         |
| Duck 28h     | virus2016 - virus2020   | 4.630          | 0.0002         |
| Duck 28h     | virus2016 - virus2021   | 1.770          | 0.4003         |
| Duck 28h     | virus2017 - virus2020   | 4.902          | 0.0001         |
| Duck 28h     | virus2017 - virus2021   | 2.043          | 0.2588         |
| Duck 28h     | virus2020 - virus2021   | -2.860         | 0.0444         |

**Table S8:** Summary of the largest differences measured for the *in ovo* models and IVPI in absolute values. Replication rate is summarized from 6 hours to 15 hours post infection. The 50% survival probability is displayed as time to death in hours post infection. Average IHC scores for the eight studied organs is calculated at 24 hours post infection.

| Virus     | IVPI chicken | Replication rate chicken | Time to death chicken | IHC chicken | IVPI Pekin duck | Replication rate Pekin duck | Time to death Pekin duck | IHC Pekin duck |
|-----------|--------------|--------------------------|-----------------------|-------------|-----------------|-----------------------------|--------------------------|----------------|
| H5N8-2014 | 3            | 0,354                    | 28,44                 | 3,75        | 1,87            | 0,42                        | 24,53                    | 3,5            |
| H5N8-2016 | 3            | 0,261                    | 31,21                 | 2,6         | 2,99            | 0,364                       | 25,77                    | 2,6            |
| H5N6-2017 | 2,99         | 0,241                    | 29,62                 | 2,6         | 3               | 0,317                       | 25,86                    | 2              |
| H5N8-2020 | 2,98         | 0,232                    | 31,23                 | 1           | 1,74            | 0,232                       | 29,84                    | 1              |
| H5N1-2021 | 3            | 0,333                    | 29,62                 | 1,75        | 1,96            | 0,387                       | 26,78                    | 2              |

**Table S9:** GISAID accession numbers.

We gratefully acknowledge the authors, originating and submitting laboratories of the sequences from GISAID's EpiFlu™ Database on which this research is based. The list is detailed below.  
 All submitters of data may be contacted directly via [www.gisaid.org](http://www.gisaid.org)

| Isolate-ID     | Isolate name                                    | Country        | Collection date | Originating Lab                                                                                      | Submitting Lab                                      | Authors                                                                                                                                                                                                           |
|----------------|-------------------------------------------------|----------------|-----------------|------------------------------------------------------------------------------------------------------|-----------------------------------------------------|-------------------------------------------------------------------------------------------------------------------------------------------------------------------------------------------------------------------|
| EPI_ISL_167140 | A/turkey/Germany-MV/R2472/2014                  | Germany        | 2014-11-04      |                                                                                                      | Friedrich-Loeffler-Institut                         | Hanna, Amanda; Ellis, Richard; Ceeraz, Vanessa; Seekings, James; Londt, Brandon; Brookes, Sharon; Banks, Jill; Essen, Stephen; Brown, Ian                                                                         |
| EPI_ISL_167904 | A/duck/England/36254/14                         | United Kingdom | 2014-11-14      | Animal and Plant Health Agency (APHA)                                                                | Animal and Plant Health Agency (APHA)               | Heutink, Rene; Harders, Frank; Verschuren-Pritz, Sylvia; Bossers, Alex; Koch, Guus; Bouwstra, Ruth                                                                                                                |
| EPI_ISL_168075 | A/chicken/Netherlands/14015531/2014             | Netherlands    | 2014-11-15      | Wageningen Bioveterinary Research                                                                    | Wageningen Bioveterinary Research                   | Puranik, Anita; Warren, Caroline; Mahmood, Sahar; Thomas, Saumya; Byrne, Alexander; Ramsay, Andrew; Everett, Helen; Skinner, Paul; Núñez, Alejandro; Watson, Samantha; Slomka, Marek; Brown, Ian; Brookes, Sharon |
| EPI_ISL_331223 | A/Duck/England/1279/2014                        | United Kingdom | 2014-11-16      | Animal and Plant Health Agency (APHA)                                                                | Animal and Plant Health Agency (APHA)               | Heutink, Rene; Harders, Frank; Verschuren-Pritz, Sylvia; Bossers, Alex; Koch, Guus; Bouwstra, Ruth                                                                                                                |
| EPI_ISL_174349 | A/chicken/Netherlands/14015766/2014             | Netherlands    | 2014-11-19      | Wageningen Bioveterinary Research                                                                    | Wageningen Bioveterinary Research                   | Heutink, Rene; Harders, Frank; Verschuren-Pritz, Sylvia; Bossers, Alex; Koch, Guus; Bouwstra, Ruth                                                                                                                |
| EPI_ISL_174350 | A/Chicken/Netherlands/14015824/2014             | Netherlands    | 2014-11-20      | Wageningen Bioveterinary Research                                                                    | Wageningen Bioveterinary Research                   | Heutink, Rene; Harders, Frank; Verschuren-Pritz, Sylvia; Bossers, Alex; Koch, Guus; Bouwstra, Ruth                                                                                                                |
| EPI_ISL_174351 | A/duck/Netherlands/14015989/2014                | Netherlands    | 2014-11-21      | Wageningen Bioveterinary Research                                                                    | Wageningen Bioveterinary Research                   | Verhagen, J.H.; Van der Jeugd, H.P.; Nolet, B.A.; Vuong, O.; Majoor, F.; De Vries, P.P.; Kharitonov, S.; Kuiken, T.; Fouchier, R.A.M.                                                                             |
| EPI_ISL_181095 | A/chicken/Netherlands/emc-3/2014                | Netherlands    | 2014-11-21      |                                                                                                      |                                                     | Verhagen, J.H.; Van der Jeugd, H.P.; Nolet, B.A.; Vuong, O.; Majoor, F.; De Vries, P.P.; Kharitonov, S.; Kuiken, T.; Fouchier, R.A.M.                                                                             |
| EPI_ISL_181093 | A/eurasian wigeon/Netherlands/1/2014            | Netherlands    | 2014-11-24      |                                                                                                      |                                                     | Verhagen, J.H.; Van der Jeugd, H.P.; Nolet, B.A.; Vuong, O.; Majoor, F.; De Vries, P.P.; Kharitonov, S.; Kuiken, T.; Fouchier, R.A.M.                                                                             |
| EPI_ISL_181094 | A/eurasian wigeon/Netherlands/2/2014            | Netherlands    | 2014-11-24      |                                                                                                      |                                                     | Heutink, Rene; Harders, Frank; Verschuren-Pritz, Sylvia; Bossers, Alex; Koch, Guus; Bouwstra, Ruth                                                                                                                |
| EPI_ISL_174352 | A/chicken/Netherlands/14016437/2014             | Netherlands    | 2014-11-29      | Wageningen Bioveterinary Research                                                                    | Wageningen Bioveterinary Research                   |                                                                                                                                                                                                                   |
| EPI_ISL_169851 | A/stork/Germany-MV/R24/2015                     | Germany        | 2014-12-01      |                                                                                                      | Friedrich-Loeffler-Institut                         |                                                                                                                                                                                                                   |
| EPI_ISL_169350 | A/turkey/Italy/14VIR7898-10/2014                | Italy          | 2014-12-15      | Istituto Zooprofilattico Sperimentale Delle Venezie                                                  | Istituto Zooprofilattico Sperimentale Delle Venezie | Luca, Tassoni; Silvia, Ormelli; Alessia, Schivo; Alice, Fusaro; Isabella, Monne; Giovanni, Cattoli                                                                                                                |
| EPI_ISL_169351 | A/turkey/Germany-NI/R3372/2014                  | Germany        | 2014-12-15      |                                                                                                      | Friedrich-Loeffler-Institut                         |                                                                                                                                                                                                                   |
| EPI_ISL_169351 | A/turkey/Germany-NI/R3372/2014                  | Germany        | 2014-12-15      |                                                                                                      | Friedrich-Loeffler-Institut                         |                                                                                                                                                                                                                   |
| EPI_ISL_239434 | A/tufted_duck/Switzerland/V246-L02001/2016      | Switzerland    | 2016-11-01      | Institut für Virologie und Immunologie - Bundesamt für Lebensmittelsicherheit und Veterinärwesen     | Friedrich-Loeffler-Institut                         |                                                                                                                                                                                                                   |
| EPI_ISL_268675 | A/T_Dk/NL-Zeewolde/16013976-001-003/2016        | Netherlands    | 2016-11-09      | Wageningen Bioveterinary Research                                                                    | Wageningen Bioveterinary Research                   | Beerens, Nancy; Heutink, Rene; Harders, Frank; Verschuren-Pritz, Sylvia; Bossers, Alex; Koch, Guus; Bergervoet, Saskia                                                                                            |
| EPI_ISL_436135 | A/chicken/Germany-MV/AR9528-L02970/2016         | Germany        | 2016-11-18      | Landesamt für Landwirtschaft, Lebensmittelsicherheit und Fischerei (LALLF)                           | Friedrich-Loeffler-Institut                         |                                                                                                                                                                                                                   |
| EPI_ISL_238895 | A/Chicken/Sweden/SVA161122KU0453/SZ0209318/2016 | Sweden         | 2016-11-21      | Swedish Veterinary Agency (SVA)                                                                      | Swedish Veterinary Agency (SVA)                     |                                                                                                                                                                                                                   |
| EPI_ISL_529179 | A/duck/Netherlands/16014829-001005/2016         | Netherlands    | 2016-11-25      | Wageningen Bioveterinary Research                                                                    | Wageningen Bioveterinary Research                   | Beerens, Nancy; Harders, Frank; Verschuren-Pritz, Sylvia; Bossers, Alex; Heutink, Rene                                                                                                                            |
| EPI_ISL_271712 | A/Goose/Hungary/63743/2016                      | Hungary        | 2016-12-11      | National Food Chain Safety Office Veterinary Diagnostic Directorate Laboratory for Molecular Biology | Danam.Vet.Molbiol                                   | Adam, Dan                                                                                                                                                                                                         |
| EPI_ISL_268650 | A/Eur_Wig/NL-West Graftdijk/16015746-003/2016   | Netherlands    | 2016-12-12      | Wageningen Bioveterinary Research                                                                    | Wageningen Bioveterinary Research                   | Beerens, Nancy; Heutink, Rene; Harders, Frank; Verschuren-Pritz, Sylvia; Bossers, Alex; Koch, Guus; Bergervoet, Saskia                                                                                            |
| EPI_ISL_240893 | A/swan/Germany-SN/R10645/2016                   | Germany        | 2016-12-13      |                                                                                                      | Friedrich-Loeffler-Institut                         |                                                                                                                                                                                                                   |
| EPI_ISL_268635 | A/Eur_Wig/NL-Akkrum/16015817-003/2016           | Netherlands    | 2016-12-13      | Wageningen Bioveterinary Research                                                                    | Wageningen Bioveterinary Research                   | Beerens, Nancy; Heutink, Rene; Harders, Frank; Verschuren-Pritz, Sylvia; Bossers, Alex; Koch, Guus; Bergervoet, Saskia                                                                                            |
| EPI_ISL_268641 | A/Eur_Wig/NL-Gouda/16015824-001/2016            | Netherlands    | 2016-12-13      | Wageningen Bioveterinary Research                                                                    | Wageningen Bioveterinary Research                   | Beerens, Nancy; Heutink, Rene; Harders, Frank; Verschuren-Pritz, Sylvia; Bossers, Alex; Koch, Guus; Bergervoet, Saskia                                                                                            |

|                  |                                                  |                    |            |                                                              |                                                              |                                                                                                                                                                             |
|------------------|--------------------------------------------------|--------------------|------------|--------------------------------------------------------------|--------------------------------------------------------------|-----------------------------------------------------------------------------------------------------------------------------------------------------------------------------|
| EPI_ISL_4064461  | A/duck/France/161298/2016                        | France             | 2016-12-16 |                                                              |                                                              | Briand,F.-X.; Niqueux,E.; Schmitz,A.; Martenot,C.; Cherbonnel,M.; Kerbrat,F.; Chatel,M.; Quenault,H.; Beven,V.; Leroux,A.; Hirchaud,E.; Lucas,P.; Blanchard,Y.; Grasland,B. |
| EPI_ISL_4064466  | A/duck/France/161449/2016                        | France             | 2016-12-22 |                                                              |                                                              | Briand,F.-X.; Niqueux,E.; Schmitz,A.; Martenot,C.; Cherbonnel,M.; Kerbrat,F.; Chatel,M.; Quenault,H.; Beven,V.; Leroux,A.; Hirchaud,E.; Lucas,P.; Blanchard,Y.; Grasland,B. |
| EPI_ISL_243085   | A/wigeon/Italy/16VIR9616-3/2016                  | Italy              | 2016-12-29 | Istituto Zooprofilattico Sperimentale Delle Venezie          | Istituto Zooprofilattico Sperimentale Delle Venezie          | Silvia,Ormelli; Sabrina,Marciano; Alessia,Schivo; Annalisa,Salviato; Adelaide,Milani; Gianpiero,Zamperini; Bianca,Zecchin; Alice,Fusaro; Calogero,Terregino; Isabella,Monne |
| EPI_ISL_5034851  | A/chicken/Poland/115/2016(H5N8)                  | Poland             | 2016-12-29 | National Veterinary Research Institut Poland, PIWet-PIB      | National Veterinary Research Institut Poland, PIWet-PIB      | Swieton E., Smietanka K.                                                                                                                                                    |
| EPI_ISL_287906   | A/Duck/Netherlands/17017236-001-005/2017         | Netherlands        | 2017-12-07 | Wageningen Bioveterinary Research                            | Wageningen Bioveterinary Research                            | Beerens, Nancy; Heutink, Rene; Harders, Frank; Verschuren-Pritz, Sylvia; Bossers, Alex; Koch, Guus; Bergervoet, Saskia                                                      |
| EPI_ISL_332433   | A/Bird/Netherlands/17017775-035-039/2017         | Netherlands        | 2017-12-15 | Wageningen Bioveterinary Research                            | Wageningen Bioveterinary Research                            | Beerens, Nancy; Heutink, Rene; Harders, Frank; Verschuren-Pritz, Sylvia; Bossers, Alex; Koch, Guus; Bergervoet, Saskia                                                      |
| EPI_ISL_292225   | A/canada_goose/England/AV58_18OPpoolEP1/2018     | United Kingdom     | 2018-01-05 | Animal and Plant Health Agency (APHA)                        | Animal and Plant Health Agency (APHA)                        | Seekings, James; Ellis, Richard; Brookes, Sharon M; Reid, Scott; Essen, Stephen; Lewis, Nicola; Brown, Ian H                                                                |
| EPI_ISL_332436   | A/Peacock/Netherlands/18000887-006/2018          | Netherlands        | 2018-01-20 | Wageningen Bioveterinary Research                            | Wageningen Bioveterinary Research                            | Beerens, Nancy; Heutink, Rene; Harders, Frank; Verschuren-Pritz, Sylvia; Bossers, Alex; Koch, Guus; Bergervoet, Saskia                                                      |
| EPI_ISL_302823   | A/Great black-backed gull/Netherlands/1/2018     | Netherlands        | 2018-01-23 | Erasmus Medical Center                                       | Erasmus Medical Center                                       | Poen,MJ; Bestebroer,TM; Vuong,O; Scheuer,RD; Kelder,L; Fouchier,RAM                                                                                                         |
| EPI_ISL_18795093 | A/Common buzzard/SVA180307SZ0416/KU000389/K-2018 | Sweden             | 2018-03-07 | Swedish Veterinary Agency (SVA)                              | Swedish Veterinary Agency (SVA)                              | "Siamak,Zohari"                                                                                                                                                             |
| EPI_ISL_305417   | A/Domestic_Duck/Netherlands/EMC-6/2018           | Netherlands        | 2018-03-13 | Erasmus Medical Center                                       | Erasmus Medical Center                                       | Poen,MJ; Bestebroer,TM; De Meulder,D; Vuong,O; Scheuer,RD; Netherlands Food and Consumer Product Safety Authority,NVWA;Koopmans,MPG; Fouchier,RAM                           |
| EPI_ISL_305454   | A/chicken/Germany-SH/AR164-L02543/2018           | Germany            | 2018-03-19 |                                                              | Friedrich-Loeffler-Institut                                  |                                                                                                                                                                             |
| EPI_ISL_306989   | A/turkey/Germany-SH/AR185-L02549/2018            | Germany            | 2018-03-19 |                                                              | Friedrich-Loeffler-Institut                                  |                                                                                                                                                                             |
| EPI_ISL_313226   | A/white stork/Germany-NI/AR251/2018              | Germany            | 2018-04-01 | Niedersaechsisches Landesgesundheitsamt                      | Friedrich-Loeffler-Institut                                  |                                                                                                                                                                             |
| EPI_ISL_332441   | A/Mallard/Netherlands/18012508-017/2018          | Netherlands        | 2018-08-24 | Wageningen Bioveterinary Research                            | Wageningen Bioveterinary Research                            | Beerens, Nancy; Heutink, Rene; Harders, Frank; Verschuren-Pritz, Sylvia; Bossers, Alex; Koch, Guus; Bergervoet, Saskia                                                      |
| EPI_ISL_654827   | A/goose/Omsk/30003/2020                          | Russian Federation | 2020-09-03 | State Research Center of Virology and Biotechnology (VECTOR) | State Research Center of Virology and Biotechnology (VECTOR) | Natalia,Goncharova; Ivan,Susloparov; Natalia,Kolosova; Alexey,Danilenko; Juliya,Bulanovich; Vasilii,Marchenko; Alexander,Ryzhikov                                           |
| EPI_ISL_654824   | A/duck/Saratov/29804/2020                        | Russian Federation | 2020-09-15 | State Research Center of Virology and Biotechnology (VECTOR) | State Research Center of Virology and Biotechnology (VECTOR) | Natalia,Goncharova; Ivan,Susloparov; Natalia,Kolosova; Alexey,Danilenko; Juliya,Bulanovich; Vasilii,Marchenko; Alexander,Ryzhikov                                           |
| EPI_ISL_5863358  | A/mallard/Georgia/DT-22360/2020                  | Georgia            | 2020-10-02 | Erasmus Medical Center                                       | Royal Veterinary College                                     | Fouchier, R.A.M.; Vuong, O.; Scheuer, R.D.; Lopes, S.; Lewis, N.S.                                                                                                          |
| EPI_ISL_603134   | A/Eurasian Wigeon/Netherlands/4/2020             | Netherlands        | 2020-10-16 | Erasmus Medical Center                                       | Erasmus Medical Center                                       |                                                                                                                                                                             |
| EPI_ISL_603132   | A/chicken/Netherlands/20016597-026030/2020       | Netherlands        | 2020-10-28 | Wageningen Bioveterinary Research                            | Wageningen Bioveterinary Research                            | Beerens, Nancy; Harders, Frank; Verschuren-Pritz, Sylvia; Roose, Marit; Germeraad, Evelien; Engelsma, Marc; Bossers, Alex; Heutink, Rene                                    |
| EPI_ISL_8650948  | A/chicken/Netherlands/20016597-026030/2020       | Netherlands        | 2020-10-28 | Wageningen Bioveterinary Research                            | Wageningen Bioveterinary Research                            | Beerens, Nancy; Harders, Frank; Pritz-Verschuren, Sylvia; Roose, Marit; Venema, Sandra; Germeraad, Evelien; Engelsma, Marc; Heutink, Rene                                   |
| EPI_ISL_1139025  | A/barnacle goose/Netherlands/20016974-002/2020   | Netherlands        | 2020-11-02 | Wageningen Bioveterinary Research                            | Wageningen Bioveterinary Research                            | Beerens, Nancy; Harders, Frank; Pritz-Verschuren, Sylvia; Roose, Marit; Germeraad, Evelien; Engelsma, Marc; Bossers, Alex; Heutink, Rene                                    |
| EPI_ISL_1139082  | A/barnacle goose/Netherlands/20016896-011/2020   | Netherlands        | 2020-11-02 | Wageningen Bioveterinary Research                            | Wageningen Bioveterinary Research                            | Beerens, Nancy; Harders, Frank; Pritz-Verschuren, Sylvia; Roose, Marit; Germeraad, Evelien; Engelsma, Marc; Bossers, Alex; Heutink, Rene                                    |
| EPI_ISL_1139041  | A/greylag goose/Netherlands/20017064-002/2020    | Netherlands        | 2020-11-03 | Wageningen Bioveterinary Research                            | Wageningen Bioveterinary Research                            | Beerens, Nancy; Harders, Frank; Pritz-Verschuren, Sylvia; Roose, Marit; Germeraad, Evelien; Engelsma, Marc; Bossers, Alex; Heutink, Rene                                    |
| EPI_ISL_710512   | A/whistling_duck/England/035643/2020             | United Kingdom     | 2020-11-19 | Animal and Plant Health Agency (APHA)                        | Animal and Plant Health Agency (APHA)                        |                                                                                                                                                                             |

|                  |                                                                       |                    |            |                                                                                                                               |                                                                 |                                                                                                                                                                                                                                                                                                  |
|------------------|-----------------------------------------------------------------------|--------------------|------------|-------------------------------------------------------------------------------------------------------------------------------|-----------------------------------------------------------------|--------------------------------------------------------------------------------------------------------------------------------------------------------------------------------------------------------------------------------------------------------------------------------------------------|
| EPI_ISL_956409   | A/common teal/Italy/20VIR7439-190/2020                                | Italy              | 2020-11-28 | Istituto Zooprofilattico Sperimentale delle<br>Venezie, EU/OIE/Reference Laboratory and FAO<br>Reference Centre for AI and ND | Istituto Zooprofilattico Sperimentale Delle<br>Venezie          | Zecchin, B.; Fusaro, A.; Milani, A.; Schivo, A.; Salviato, A.; Pastori,<br>A.; Zamperin, G.; Monne, I.; Terregino, C.                                                                                                                                                                            |
| EPI_ISL_779129   | A/turkey/Poland/464/2020(H5N8)                                        | Poland             | 2020-12-01 | National Veterinary Research Institut Poland,<br>PIWet-PIB                                                                    | National Veterinary Research Institut Poland,<br>PIWet-PIB      | Swieton E., Smietanka K.                                                                                                                                                                                                                                                                         |
| EPI_ISL_18718161 | A/duck/France/PPNL-20P017941/2020                                     | France             | 2020-12-10 | Ploufragan-Plouzane-Niort Laboratory                                                                                          | Ploufragan-Plouzane-Niort Laboratory                            | Briand,F.-x., Niqueux,E., Schmitz,A., Martenot,C., Cherbonnel,M.,<br>Massin,P., Bussan,R., Guillemoto,C., Pierre,I., Louboutin,K.,<br>Souchaud,F., Allee,C., Quenault,H., Beven,V., Leroux,A., Lucas,P.,<br>Hirchaud,E., Van de Wiele,A., Blanchard,Y., Scoizec,A.,<br>LeBouquin,S.; Grasland,B. |
| EPI_ISL_1039238  | A/chicken/Astrakhan/321-09/2020                                       | Russian Federation | 2020-12-12 | State Research Center of Virology and<br>Biotechnology (VECTOR)                                                               | State Research Center of Virology and<br>Biotechnology (VECTOR) | Natalia,Goncharova; Ivan,Susloparov; Natalia,Kolosova;<br>Alexey,Danilenko; Juliya,Bulanovich; Vasilij,Marchenko;<br>Alexander,Ryzhikov                                                                                                                                                          |
| EPI_ISL_1122425  | A/chicken/England/043315/2020                                         | United Kingdom     | 2020-12-15 | Animal and Plant Health Agency (APHA)                                                                                         | Animal and Plant Health Agency (APHA)                           |                                                                                                                                                                                                                                                                                                  |
| EPI_ISL_846623   | A/swan/Poland/MB141/2020(H5N8)                                        | Poland             | 2020-12-16 | National Veterinary Research Institut Poland,<br>PIWet-PIB                                                                    | National Veterinary Research Institut Poland,<br>PIWet-PIB      | Swieton, E.; Smietanka, K.                                                                                                                                                                                                                                                                       |
| EPI_ISL_1123351  | A/duck/England/043628/2020                                            | United Kingdom     | 2020-12-18 | Animal and Plant Health Agency (APHA)                                                                                         | Animal and Plant Health Agency (APHA)                           |                                                                                                                                                                                                                                                                                                  |
| EPI_ISL_1665267  | A/mute_swan/Slovenia/1914-20_21VIR959-<br>5/2020                      | Slovenia           | 2020-12-24 | Istituto Zooprofilattico Sperimentale delle<br>Venezie, EU/OIE/Reference Laboratory and FAO<br>Reference Centre for AI and ND | Istituto Zooprofilattico Sperimentale Delle<br>Venezie          | Slavec, B.; Racnik, J.; Zorman Rojs, Olga.; Zecchin, B.; Fusaro, A.;<br>Pastori, A.; Schivo, A.; Salviato, A.; Monne, I.; Terregino, C.                                                                                                                                                          |
| EPI_ISL_7622862  | A/Anser_brachyrhynchus/Belgium/151/2020                               | Belgium            | 2020-12-26 | Sciensano - Animal Infectious Diseases                                                                                        | Sciensano, Department of Animal Infectious<br>Diseases          | Van Borm, Steven; Vandebussche, Frank; Roupie, Virginie;<br>Lambrecht, Benedicte; Steensels, Mieke                                                                                                                                                                                               |
| EPI_ISL_7778769  | A/pheasant/Finland/499_21VIR7689-1/2021                               | Finland            | 2021-01-01 | Finnish Food Authority                                                                                                        | Istituto Zooprofilattico Sperimentale Delle<br>Venezie          | Tammiranta, N.; Kantala, T.; Laamanen, I.; Gadd, T.; Zecchin, B.;<br>Fusaro, A.; Schivo, A.; Salviato, A.; Palumbo, E.; Milani, A.;<br>Giussani, E.; Pastori, A.; Monne, I.; Terregino, C.                                                                                                       |
| EPI_ISL_775267   | A/turkey/Netherlands/21020942-001005/2021                             | Netherlands        | 2021-01-04 | Wageningen Bioveterinary Research                                                                                             | Wageningen Bioveterinary Research                               | Beerens, Nancy; Harders, Frank; Pritz-Verschuren, Sylvia; Roose,<br>Marit; Germeraad, Evelien; Engelsma, Marc; Bossers, Alex;<br>Heutink, Rene                                                                                                                                                   |
| EPI_ISL_5095321  | A/turkey/Germany-NI/AI00429/2021                                      | Germany            | 2021-01-08 | Lebensmittel- und Veterinärinstitut Oldenburg -<br>Standort Veterinärinstitut                                                 | Friedrich-Loeffler-Institut                                     |                                                                                                                                                                                                                                                                                                  |
| EPI_ISL_943555   | A/Chicken/Sweden/SVA210117SZ0004/KN0113<br>21/2021                    | Sweden             | 2021-01-16 | Swedish Veterinary Agency (SVA)                                                                                               | Swedish Veterinary Agency (SVA)                                 |                                                                                                                                                                                                                                                                                                  |
| EPI_ISL_7778760  | A/mute_swan/Estonia/TA2106615_21VIR7512-<br>4/2021                    | Estonia            | 2021-03-04 | Estonian Veterinary and Food Laboratory                                                                                       | Istituto Zooprofilattico Sperimentale Delle<br>Venezie          | Nurmoja, I.; Vilem, A.; Juurik, T.; Zecchin, B.; Fusaro, A.; Schivo,<br>A.; Salviato, A.; Palumbo, E.; Milani, A.; Giussani, E.; Pastori, A.;<br>Monne, I.; Terregino, C.                                                                                                                        |
| EPI_ISL_1697187  | A/chicken/Czech Republic/6542-1/2021                                  | Czech Republic     | 2021-04-03 | State Veterinary Institute Prague                                                                                             | State Veterinary Institute Prague                               | Nagy,A;Cernikova,L;Stara,M                                                                                                                                                                                                                                                                       |
| EPI_ISL_18458048 | A/chicken/Lithuania/4525_21VIR3369-3/2021                             | Lithuania          | 2021-04-25 | Lithuanian National Food and Veterinary Risk<br>Assessment Institute (NFVRAI)                                                 | Istituto Zooprofilattico Sperimentale Delle<br>Venezie          | Pileviciene, S.;Janeliunas, Z.;Zecchin, B.;Pastori, A.;Fusaro,<br>A.;Schivo, A.;Salviato, A.;Palumbo, E.;Giussani, E.;Monne,<br>I.;Terregino, C.                                                                                                                                                 |
| EPI_ISL_7753173  | A/Eurasian wigeon/Germany-SH/AI05956/2021                             | Germany            | 2021-10-14 | Landeslabor Schleswig-Holstein                                                                                                | Friedrich-Loeffler-Institut                                     |                                                                                                                                                                                                                                                                                                  |
| EPI_ISL_9856775  | A/chicken/Netherlands/21037287-006010/2021                            | Netherlands        | 2021-10-25 | Wageningen Bioveterinary Research                                                                                             | Wageningen Bioveterinary Research                               | Beerens, Nancy; Harders, Frank; Pritz-Verschuren, Sylvia; Roose,<br>Marit; Venema, Sandra; Germeraad, Evelien; Engelsma, Marc;<br>Heutink, Rene; Luca, Bordes                                                                                                                                    |
| EPI_ISL_6101869  | A/goose/Netherlands/21037720-001/2021                                 | Netherlands        | 2021-10-28 | Wageningen Bioveterinary Research                                                                                             | Wageningen Bioveterinary Research                               | Beerens, Nancy; Harders, Frank; Pritz-Verschuren, Sylvia; Roose,<br>Marit; Germeraad, Evelien; Engelsma, Marc; Heutink, Rene                                                                                                                                                                     |
| EPI_ISL_7054770  | A/European herring<br>gull/Sweden/SVA211116SZ0432/FB004518/M-<br>2021 | Sweden             | 2021-11-08 | Swedish Veterinary Agency (SVA)                                                                                               | Swedish Veterinary Agency (SVA)                                 |                                                                                                                                                                                                                                                                                                  |
| EPI_ISL_7683079  | A/mute swan/Netherlands/21039627-002/2021                             | Netherlands        | 2021-11-26 | Wageningen Bioveterinary Research                                                                                             | Wageningen Bioveterinary Research                               | Beerens, Nancy; Harders, Frank; Pritz-Verschuren, Sylvia; Roose,<br>Marit; Venema, Sandra; Germeraad, Evelien; Engelsma, Marc;<br>Heutink, Rene                                                                                                                                                  |
| EPI_ISL_14760648 | A/chicken/Italy/21VIR10382/2021                                       | Italy              | 2021-11-29 | Istituto Zooprofilattico Sperimentale delle<br>Venezie, EU/OIE/Reference Laboratory and FAO<br>Reference Centre for AI and ND | Istituto Zooprofilattico Sperimentale delle<br>Venezie          | Barbierato, G.; Zecchin, B.; Fusaro, A.; Schivo, A.; Salviato, A.;<br>Palumbo, E.; Giussani, E.; Pastori, A.; Monne, I.; Terregino, C.                                                                                                                                                           |
| EPI_ISL_14760678 | A/chicken/Italy/21VIR10637-2/2021                                     | Italy              | 2021-12-04 | Istituto Zooprofilattico Sperimentale delle<br>Venezie, EU/OIE/Reference Laboratory and FAO<br>Reference Centre for AI and ND | Istituto Zooprofilattico Sperimentale delle<br>Venezie          | Barbierato, G.; Zecchin, B.; Fusaro, A.; Schivo, A.; Salviato, A.;<br>Palumbo, E.; Giussani, E.; Pastori, A.; Monne, I.; Terregino, C.                                                                                                                                                           |

|                  |                                                   |                |            |                                                                                                                         |                                                     |                                                                                                                                                                                                                                                                 |
|------------------|---------------------------------------------------|----------------|------------|-------------------------------------------------------------------------------------------------------------------------|-----------------------------------------------------|-----------------------------------------------------------------------------------------------------------------------------------------------------------------------------------------------------------------------------------------------------------------|
| EPI_ISL_13370520 | A/mute_swan/England/244574/2021                   | United Kingdom | 2021-12-06 | Animal and Plant Health Agency (APHA)                                                                                   | Animal and Plant Health Agency (APHA)               | Savić, Vladimir; Pastori, Ambra; Zecchin, Bianca; Fusaro, Alice; Schivo, Alessia; Salviato, Annalisa; Palumbo, Elisa; Giussani, Edoardo; Monne, Isabella; Terregino, Calogero                                                                                   |
| EPI_ISL_18361460 | A/grey heron/Croatia/132-b/2021                   | Croatia        | 2021-12-08 | Croatian Veterinary Institute, Poultry Centre                                                                           | Istituto Zooprofilattico Sperimentale delle Venezie | Barbierato, G.; Zecchin, B.; Fusaro, A.; Schivo, A.; Salviato, A.; Palumbo, E.; Giussani, E.; Pastori, A.; Monne, I.; Terregino, C.                                                                                                                             |
| EPI_ISL_14760774 | A/chicken/Italy/21VIR11385-1/2021                 | Italy          | 2021-12-16 | Istituto Zooprofilattico Sperimentale delle Venezie, EU/OIE/Reference Laboratory and FAO Reference Centre for AI and ND | Istituto Zooprofilattico Sperimentale delle Venezie | Barbierato, G.; Zecchin, B.; Fusaro, A.; Schivo, A.; Salviato, A.; Palumbo, E.; Giussani, E.; Pastori, A.; Monne, I.; Terregino, C.                                                                                                                             |
| EPI_ISL_14760849 | A/turkey/Italy/21VIR11509/2021                    | Italy          | 2021-12-20 | Istituto Zooprofilattico Sperimentale delle Venezie, EU/OIE/Reference Laboratory and FAO Reference Centre for AI and ND | Istituto Zooprofilattico Sperimentale delle Venezie | Barbierato, G.; Zecchin, B.; Fusaro, A.; Schivo, A.; Salviato, A.; Palumbo, E.; Giussani, E.; Pastori, A.; Monne, I.; Terregino, C.                                                                                                                             |
| EPI_ISL_13370629 | A/Common_Buzzard/England/245285/2021              | United Kingdom | 2021-12-31 | Animal and Plant Health Agency (APHA)                                                                                   | Animal and Plant Health Agency (APHA)               | Slavec, B.; Ražnik, J.; Krapež, U.; Žlabavec, Z.; Ažko, J.; Cociancich, V.; Paller, T.; Vidrih, P.; Rojs, O.Z.; Arseniev, S.; Groza, O.; Barbierato, G.; Zecchin, B.; Fusaro, A.; Schivo, A.; Salviato, A.; Palumbo, E.; Giussani, E.; Monne, I.; Terregino, C. |
| EPI_ISL_11007535 | A/swan/Slovenia/13_22VIR777-8/2022                | Slovenia       | 2022-01-03 | University of Ljubljana                                                                                                 | Istituto Zooprofilattico Sperimentale delle Venezie | Savić, Vladimir; Pastori, Ambra; Zecchin, Bianca; Fusaro, Alice; Schivo, Alessia; Salviato, Annalisa; Palumbo, Elisa; Giussani, Edoardo; Monne, Isabella; Terregino, Calogero                                                                                   |
| EPI_ISL_8694715  | A/chicken/Croatia/7/2022                          | Croatia        | 2022-01-10 | Croatian Veterinary Institute, Poultry Centre                                                                           | Croatian Veterinary Institute                       | Ruano, M.J.; Rocha, A.; Sanchez, A.; Agüero, M.; Barbierato, G.; Zecchin, B.; Fusaro, A.; Schivo, A.; Salviato, A.; Palumbo, E.; Giussani, E.; Monne, I.; Terregino, C.                                                                                         |
| EPI_ISL_11112340 | A/Barnacle Goose/Netherlands/10/2022              | Netherlands    | 2022-02-07 | Erasmus Medical Center                                                                                                  | Erasmus Medical Center                              | Ruano, M.J.; Rocha, A.; Sanchez, A.; Agüero, M.; Barbierato, G.; Zecchin, B.; Fusaro, A.; Schivo, A.; Salviato, A.; Palumbo, E.; Giussani, E.; Monne, I.; Terregino, C.                                                                                         |
| EPI_ISL_11259294 | A/chicken/Spain/452-1_22VIR2142-21/2022           | Spain          | 2022-02-07 | Laboratorio Central de Veterinaria                                                                                      | Istituto Zooprofilattico Sperimentale delle Venezie | Ruano, M.J.; Rocha, A.; Sanchez, A.; Agüero, M.; Barbierato, G.; Zecchin, B.; Fusaro, A.; Schivo, A.; Salviato, A.; Palumbo, E.; Giussani, E.; Monne, I.; Terregino, C.                                                                                         |
| EPI_ISL_11560324 | A/Graylag goose/Netherlands/2/2022                | Netherlands    | 2022-03-06 | Erasmus Medical Center                                                                                                  | Erasmus Medical Center                              | Beerens, Nancy; Harders, Frank; Pritz-Verschuren, Sylvia; Roose, Marit; Venema, Sandra; Germeraad, Evelien; Engelsma, Marc; Heutink, Rene                                                                                                                       |
| EPI_ISL_13990733 | A/chicken/Spain/942-8_22VIR6312-34/2022           | Spain          | 2022-03-08 | Laboratorio Central de Veterinaria                                                                                      | Istituto Zooprofilattico Sperimentale delle Venezie | Beerens, Nancy; Harders, Frank; Pritz-Verschuren, Sylvia; Roose, Marit; Venema, Sandra; Germeraad, Evelien; Engelsma, Marc; Heutink, Rene                                                                                                                       |
| EPI_ISL_13370916 | A/chicken/England/033318/2022                     | United Kingdom | 2022-03-27 | Animal and Plant Health Agency (APHA)                                                                                   | Animal and Plant Health Agency (APHA)               | Beerens, Nancy; Harders, Frank; Pritz-Verschuren, Sylvia; Roose, Marit; Venema, Sandra; Germeraad, Evelien; Engelsma, Marc; Heutink, Rene                                                                                                                       |
| EPI_ISL_12215419 | A/goose/Netherlands/22007407-002/2022             | Netherlands    | 2022-04-15 | Wageningen Bioveterinary Research                                                                                       | Wageningen Bioveterinary Research                   | Beerens, Nancy; Harders, Frank; Pritz-Verschuren, Sylvia; Roose, Marit; Venema, Sandra; Germeraad, Evelien; Engelsma, Marc; Heutink, Rene                                                                                                                       |
| EPI_ISL_14987487 | A/common guillemot/Sweden/SVA220727S20354/FB00246 | Sweden         | 2022-07-27 | Swedish Veterinary Agency (SVA)                                                                                         | Swedish Veterinary Agency (SVA)                     | Beerens, Nancy; Harders, Frank; Pritz-Verschuren, Sylvia; Roose, Marit; Venema, Sandra; Germeraad, Evelien; Engelsma, Marc; Heutink, Rene                                                                                                                       |
| EPI_ISL_14497870 | A/domestic_duck/England/105414/2022               | United Kingdom | 2022-08-07 | Animal and Plant Health Agency (APHA)                                                                                   | Animal and Plant Health Agency (APHA)               | Beerens, Nancy; Harders, Frank; Pritz-Verschuren, Sylvia; Roose, Marit; Venema, Sandra; Germeraad, Evelien; Engelsma, Marc; Heutink, Rene                                                                                                                       |
| EPI_ISL_15038819 | A/partridge/England/115171/2022                   | United Kingdom | 2022-09-05 | Animal and Plant Health Agency (APHA)                                                                                   | Animal and Plant Health Agency (APHA)               | Beerens, Nancy; Harders, Frank; Pritz-Verschuren, Sylvia; Roose, Marit; Venema, Sandra; Germeraad, Evelien; Engelsma, Marc; Heutink, Rene                                                                                                                       |
